# Supplementary material
Source: PubMed Central journal article supplement (PMC4676531)

**Figure S1. Distributions of age at diagnosis in the three cohorts of breast cancer populations.** For the Guedj cohort, the clinical record system may be different from the other two cohorts, as age at initial diagnosis was recorded (GUEDJ *et al.* 2012).

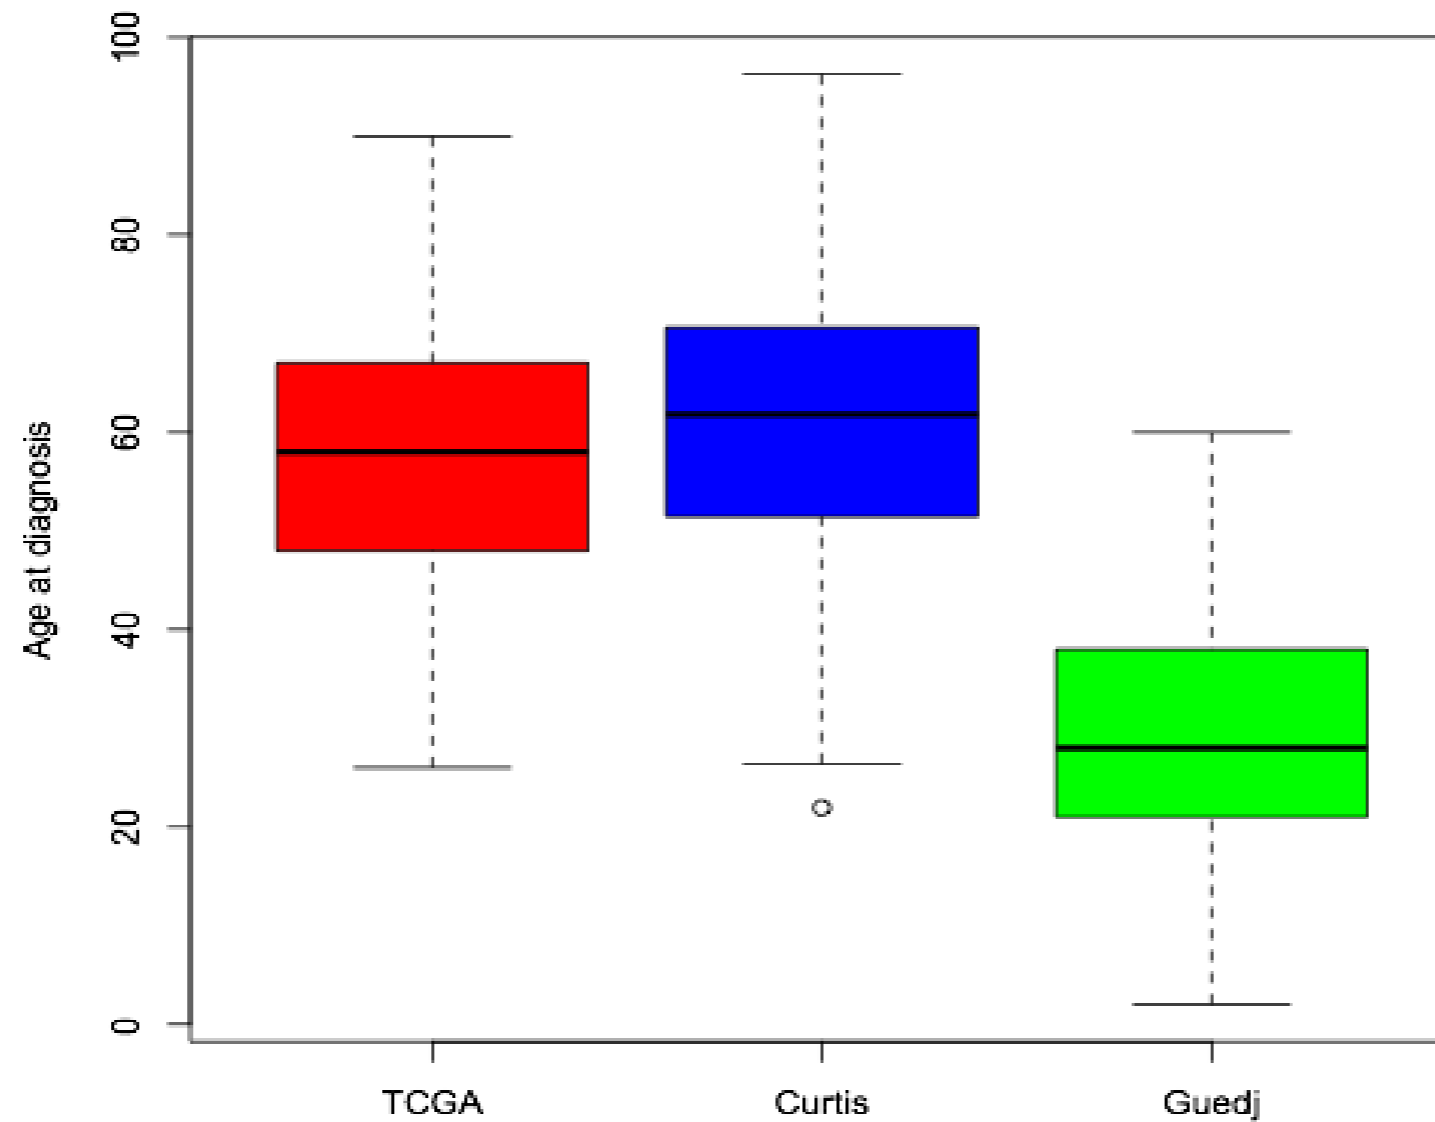

Supplement: supp_115.180125_FigureS1.pdf [file supp_115.180125_FigureS1.pdf]
