# Supplementary material
Source: PubMed Central journal article supplement (PMC4676531)

**Figure S3. Gene expression patterns of the MR16 genes selected by machine learning.** The box plots show gene expression across subtypes. The y-axis is the gene expression adjusted by van der Waerden scores (LEHMANN AND HJM 1988). The x-axis represents the four subtypes; that is, bs = basal-like; h2 = HER2 enriched; la = luminal A; lb = luminal B.

## Top 1-9 genes

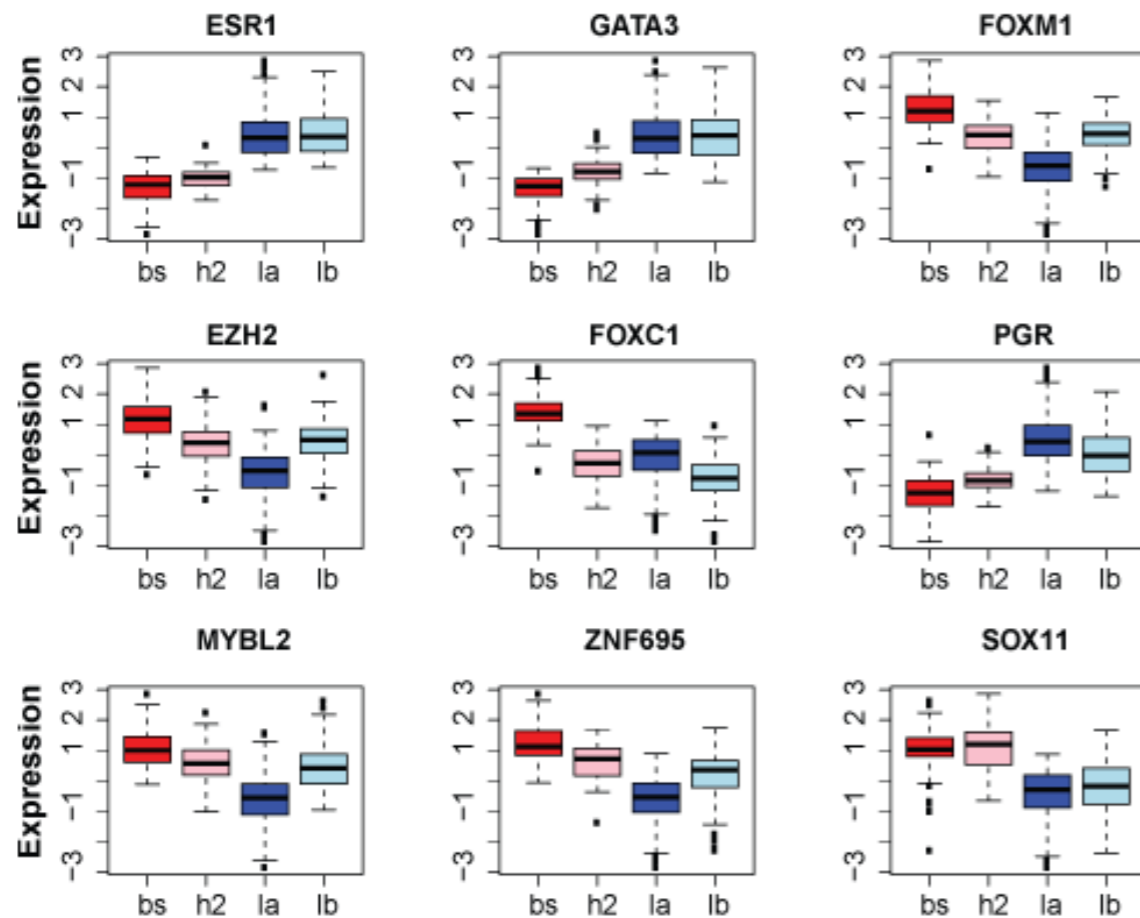

## Top 10-16 genes

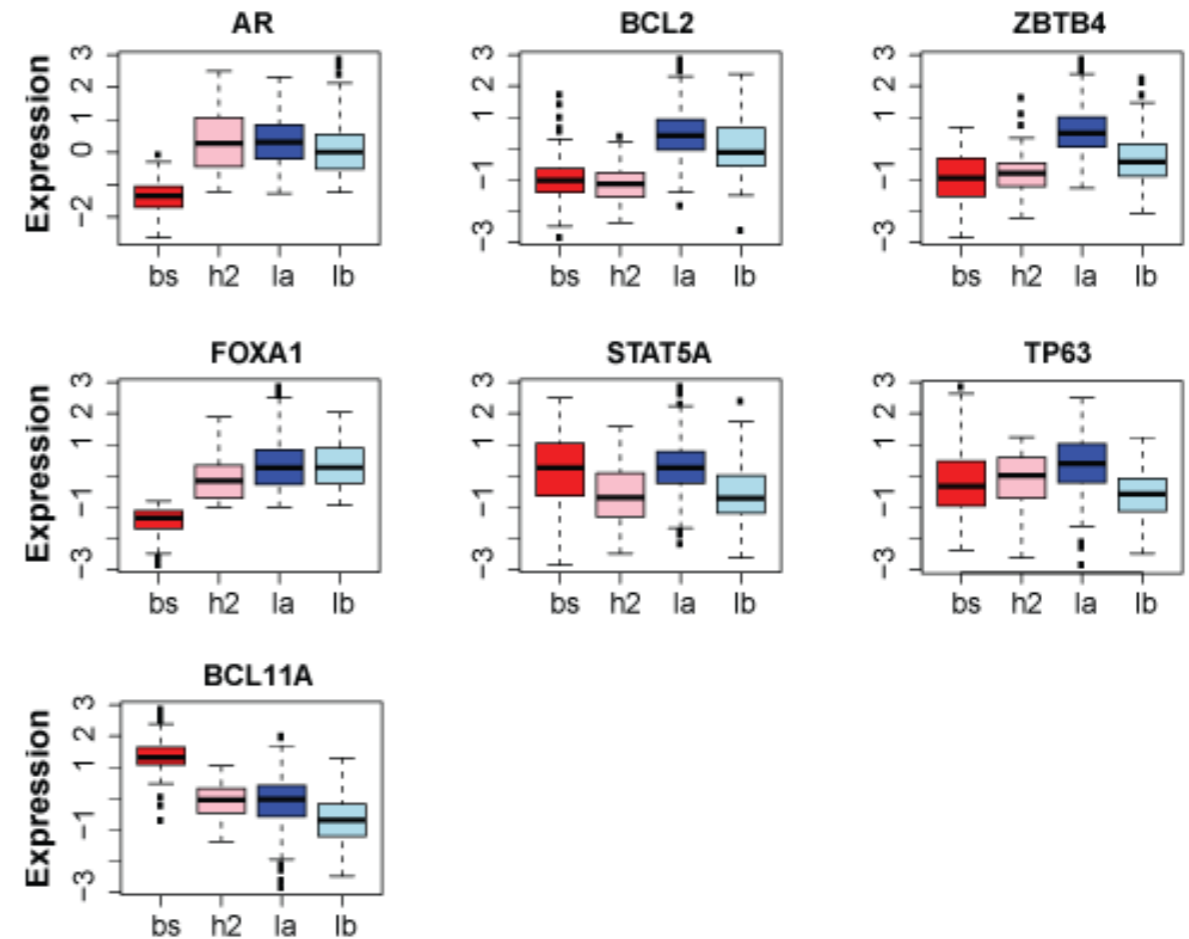

Supplement: supp_115.180125_FigureS3.pdf [file supp_115.180125_FigureS3.pdf]
