# Supplementary material
Source: PubMed Central journal article supplement (PMC4676531)

**Figure S9. Validation of regulator-regulon interaction patterns in the Curtis cohort.** See Figure S8 for nodes and edges. **A:** a gene regulatory network specific to the luminal B subtype. The central genes are the Group 1MRs. The genes highlighted in green are either cell cycle genes or Group 2 MRs. **B:** a gene regulatory network specific to the basal-like subtype. The central genes are the Group 2 MRs. The genes highlighted in green are either cell cycle genes or Group 1 MRs.

# Figure S9

## A

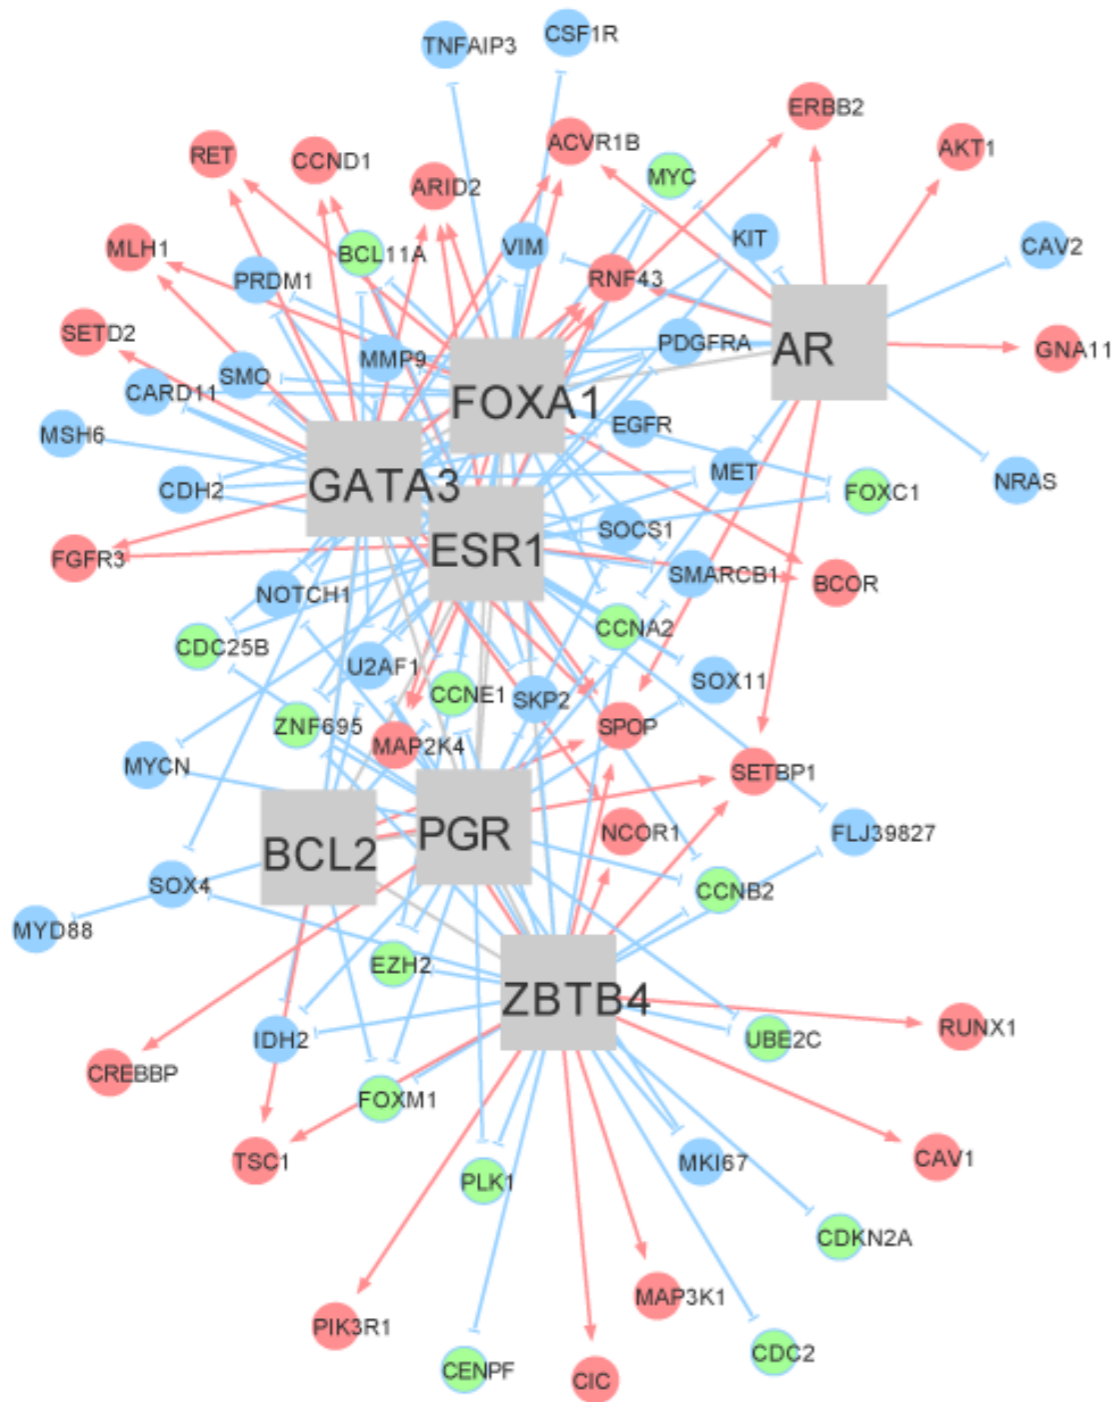

## B

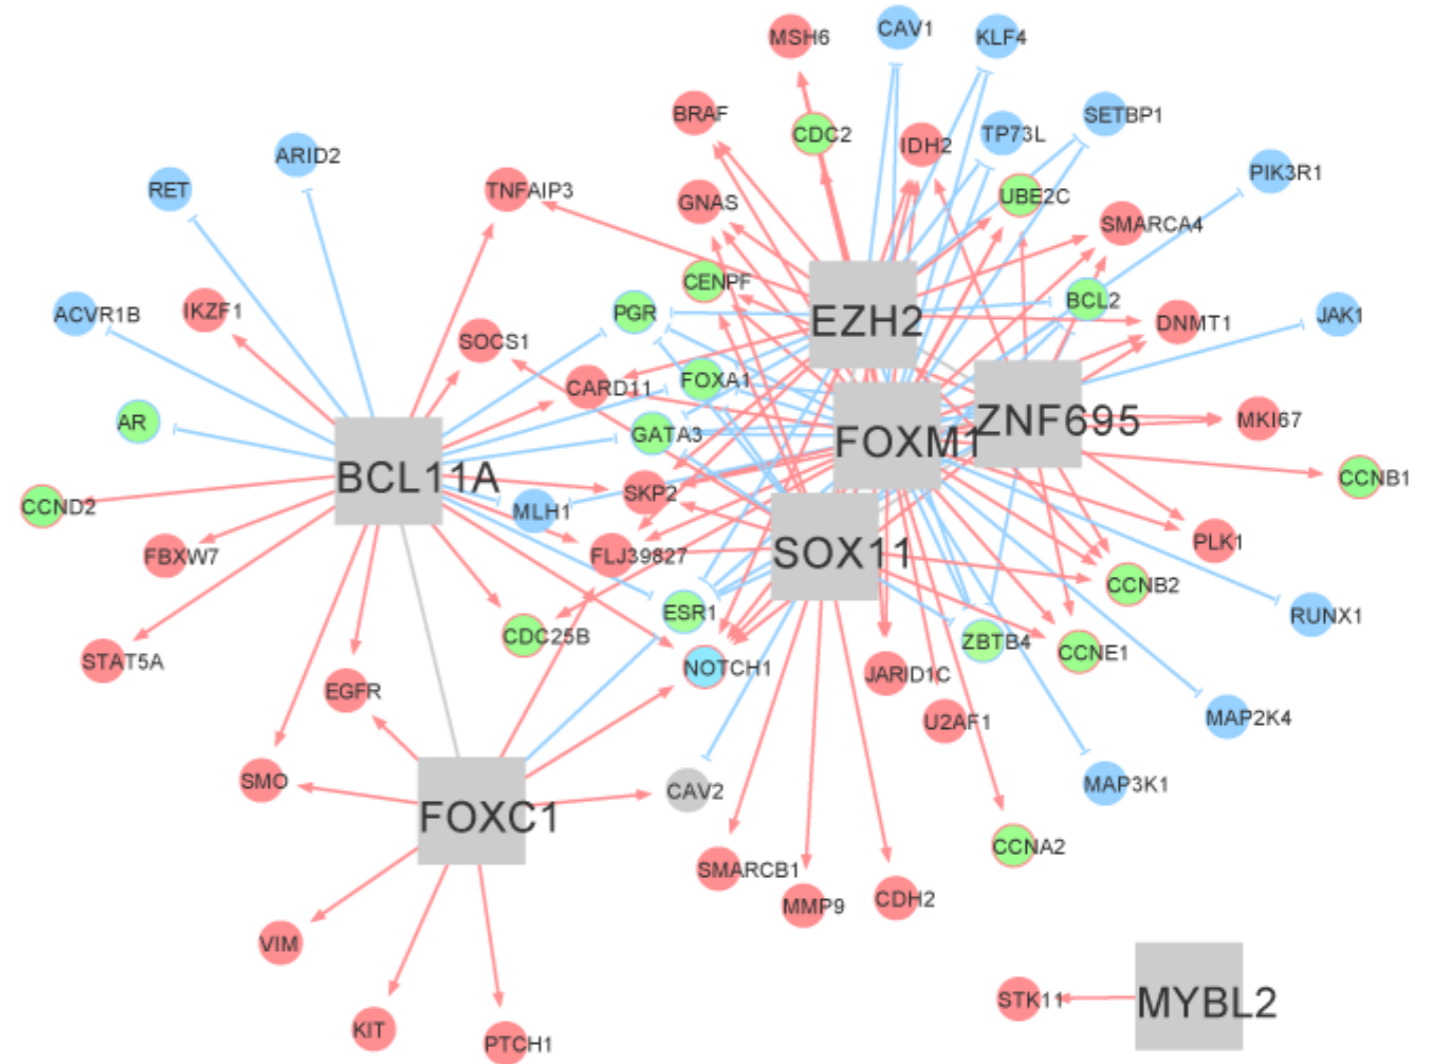

Supplement: supp_115.180125_FigureS9.pdf [file supp_115.180125_FigureS9.pdf]
