# Supplementary material
Source: PubMed Central journal article supplement (PMC4676531)

**Figure S11. The relationships between MR16 and the PAM50.** The central genes are the two MR groups: purple color = Group 1; green color = Group 2. See Figure S8 for nodes and edges. Red and blue colors denote up- and down-regulation, respectively. Results from mutual information modeling indicate that the majority of PAM50 genes are target genes regulated by the MR16, except for the overlapping genes.

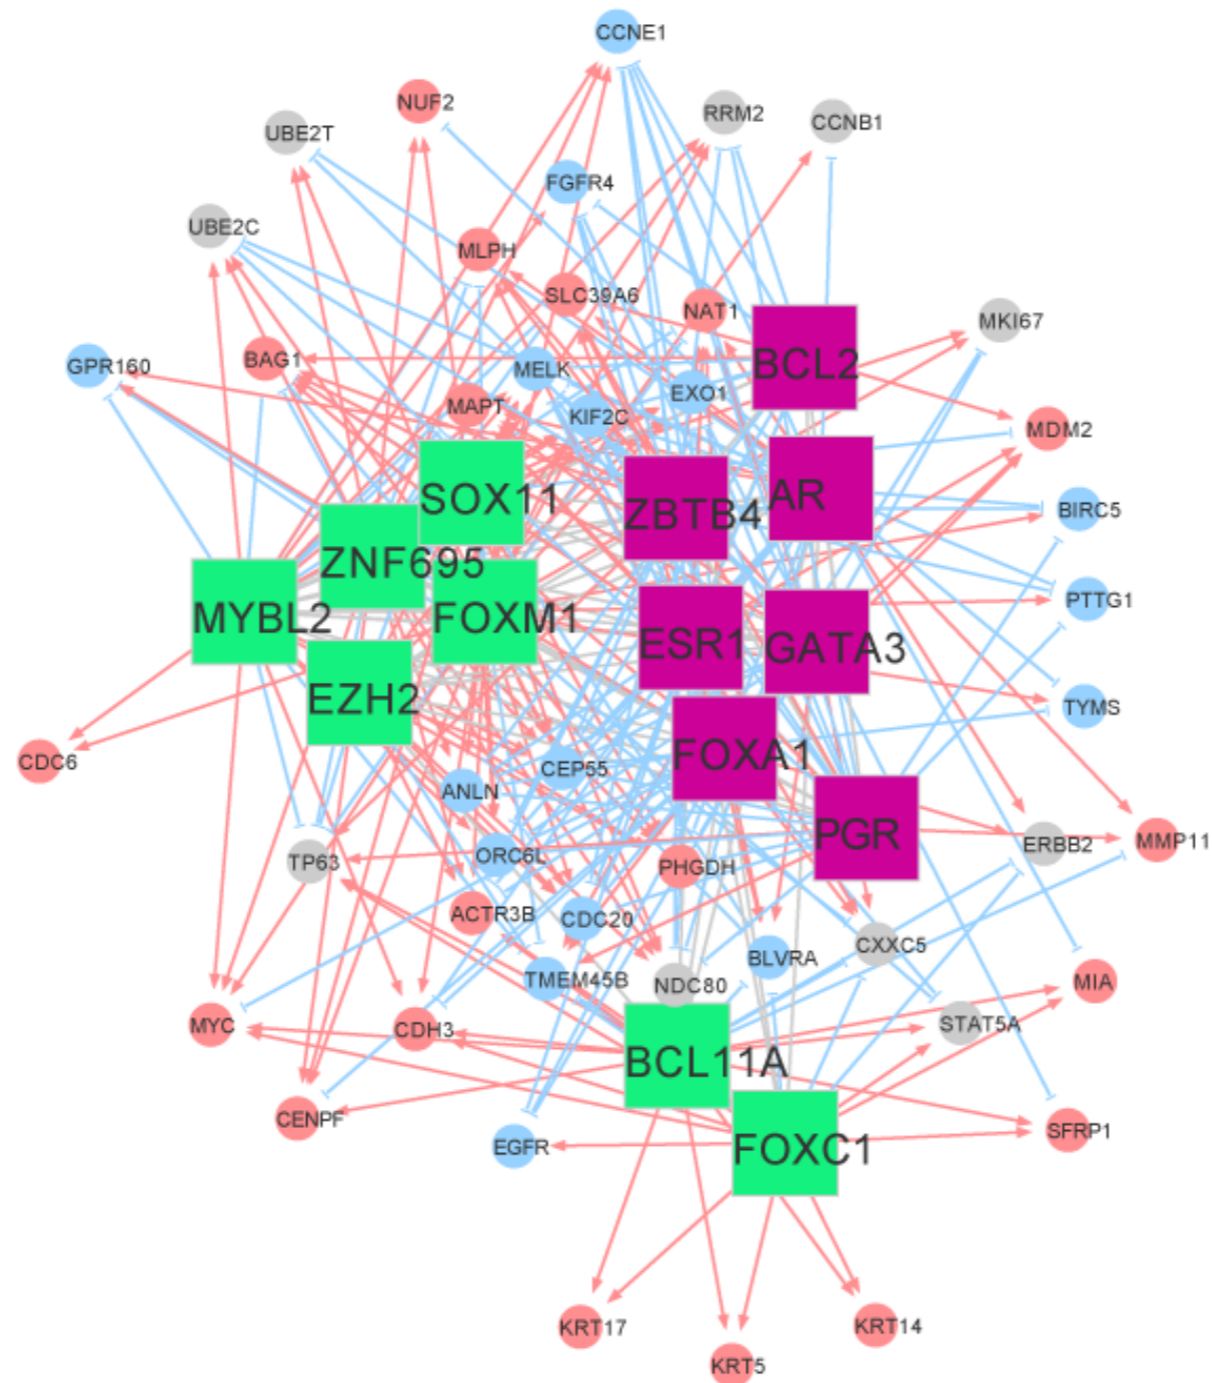

Supplement: supp_115.180125_FigureS11.pdf [file supp_115.180125_FigureS11.pdf]
