# Supplementary material
Source: PubMed Central journal article supplement (PMC4676531)
Supplement: supp_115.180125_TableS1.pdf [file supp_115.180125_TableS1.pdf]

Table S1. Mutation types in the top three genes\*

| <i>Type</i>     | <i>PIK3CA</i> | <i>TP53</i> | <i>GATA3</i> |
|-----------------|---------------|-------------|--------------|
| Frame_Shift_Del | 0             | 33          | 14           |
| Frame_Shift_Ins | 2             | 13          | 45           |
| In_Frame_Del    | 13            | 5           | 0            |
| In_Frame_Ins    | 1             | 0           | 0            |
| Missense        | 273           | 158         | 6            |
| Nonsense        | 0             | 35          | 0            |
| Silent          | 4             | 3           | 1            |
| Splice_Site     | 0             | 18          | 20           |
| <i>Total</i>    | <i>293</i>    | <i>265</i>  | <i>86</i>    |

\* The mutation types are summarized here based on the 720 TCGA breast cancer cases.

\* The original data in variant call format are downloaded from the TCGA data portal (<https://tcga-data.nci.nih.gov/>).
